# Supplementary material for: Nigella damascena L. Essential Oil—A Valuable Source of β-Elemene for Antimicrobial Testing
Source: PubMed Central journal article supplement (PMC6017462; doi:10.3390/molecules23020256), 2018-01-28
Supplement: molecules-23-00256-s001.pdf [file molecules-23-00256-s001.pdf]

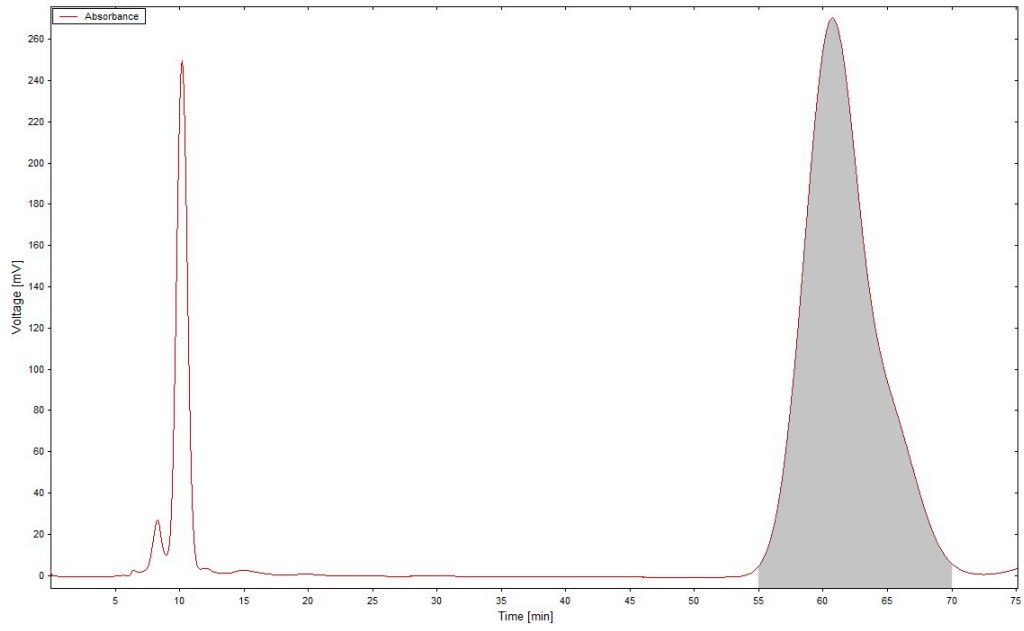

Figure S1. HPCCC chromatogram of *N. damascena* essential oil.

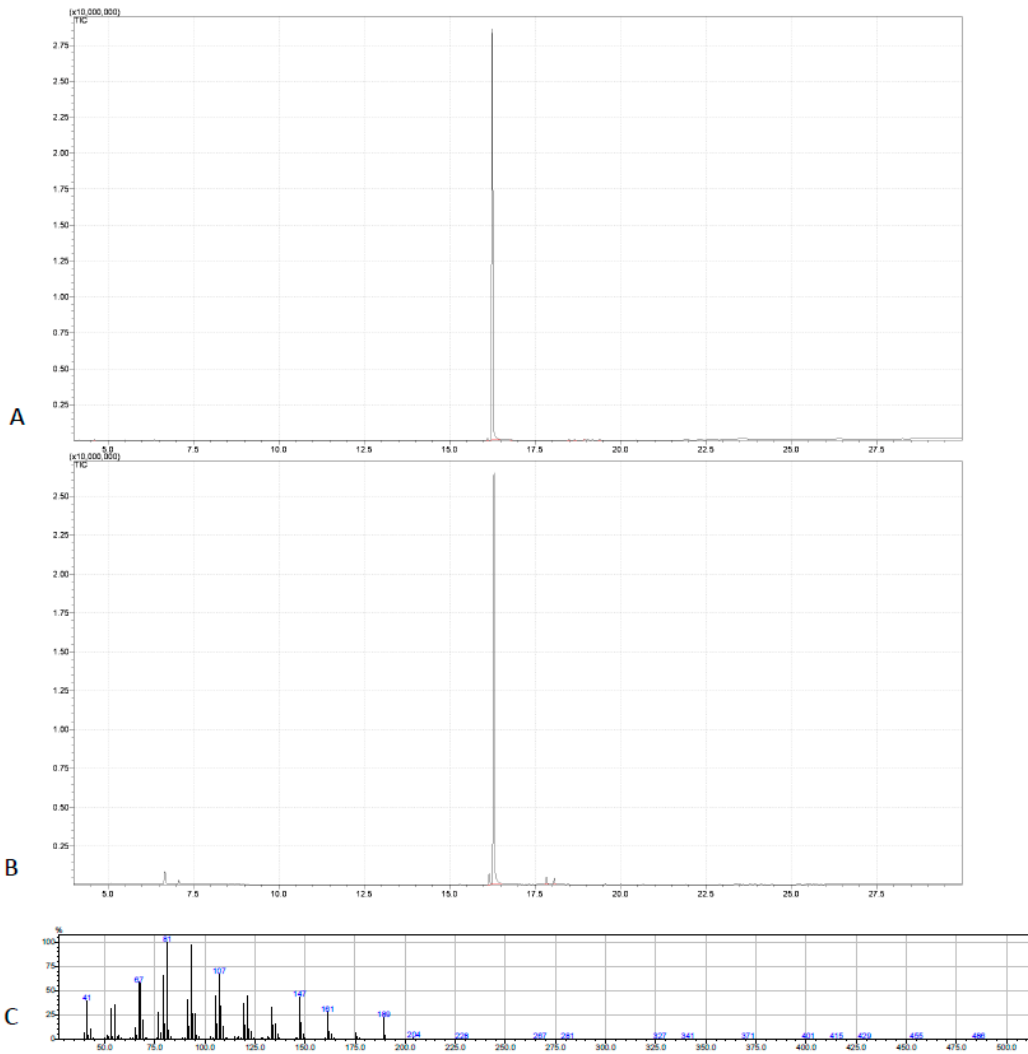

Figure S2 A: GC chromatogram of *N. damascena* essential oil, B: GC chromatogram of  $\beta$ -elemene standard, C: GC chromatogram of isolated  $\beta$ -elemene, D: MS spectrum of  $\beta$ -elemene;

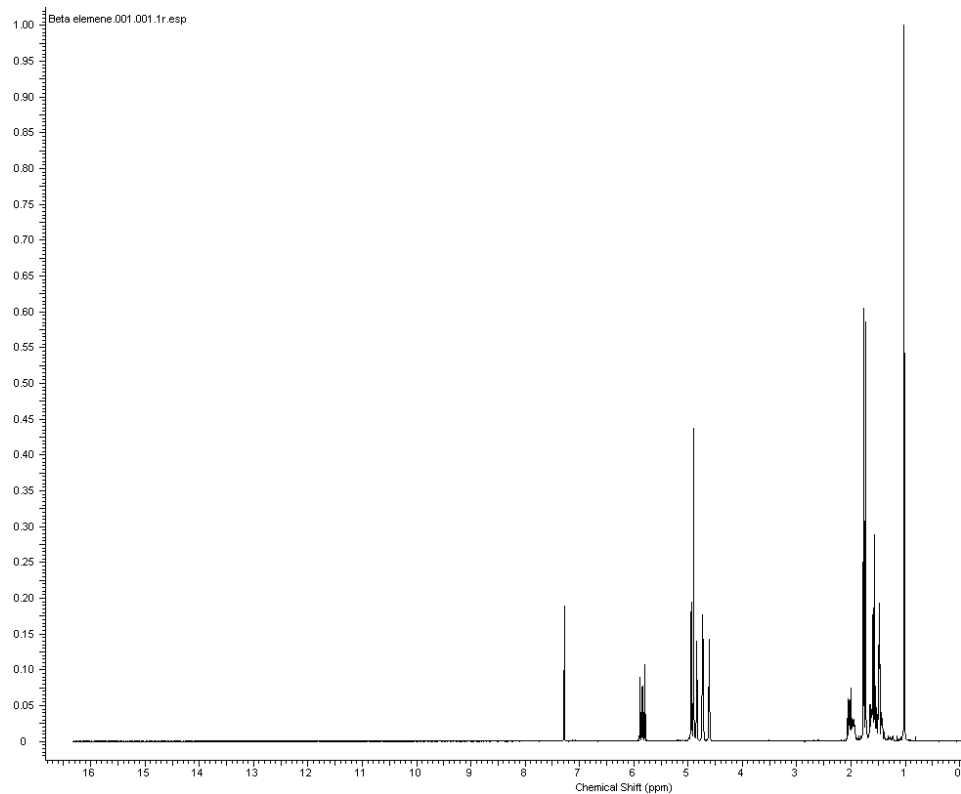

Figure S3:  $^1\text{H}$  NMR spectrum of  $\beta$ -elemene.

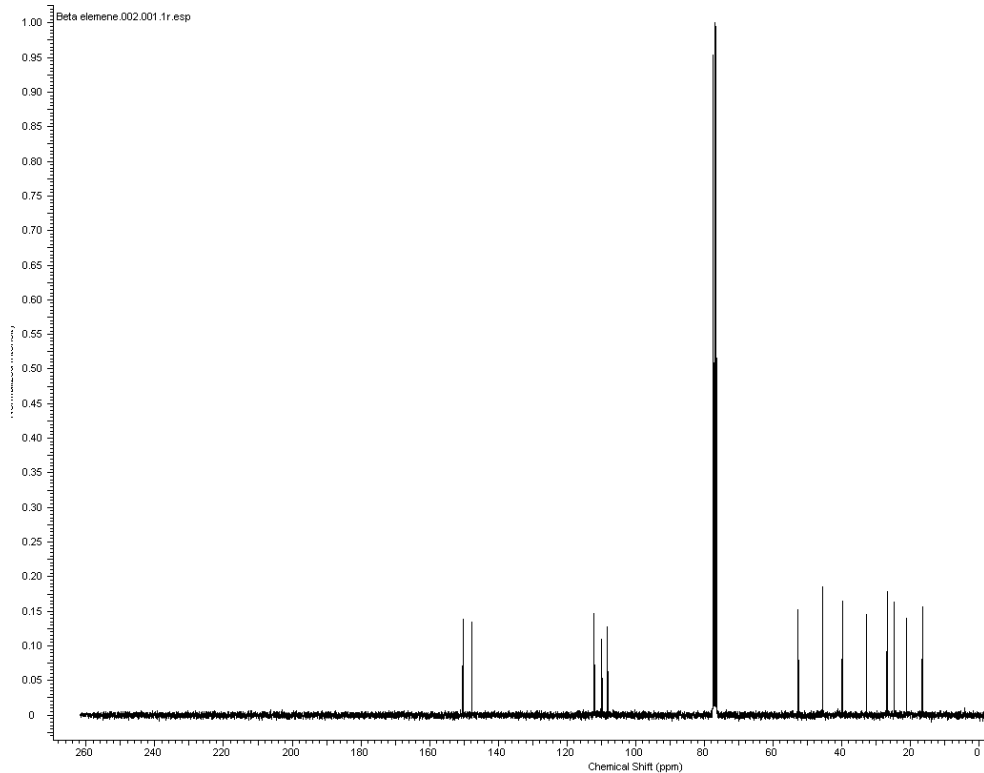

Figure S4:  $^{13}\text{C}$  NMR spectrum of  $\beta$ -elemene.
